# Supplementary material for: Mesocrystal Co9S8 hollow sphere anodes for high performance lithium ion batteries
Source: Royal Society of Chemistry journal article supplement (doi:10.1039/c4ta02551b), 2014-01-01
Supplement: c4ta02551b1.pdf [file c4ta02551b1.pdf]

## **Mesocrystal Co<sub>9</sub>S<sub>8</sub> hollow sphere anode for high performance lithium ion batteries**

Rencheng Jin,<sup>\*a</sup> Junhao Zhou,<sup>a</sup> Yanshuai Guan,<sup>a</sup> Hong Liu,<sup>a</sup> Gang Chen<sup>b</sup>

<sup>a</sup> *School of Chemistry & Materials Science, Ludong University, Yantai 264025, P. R.*

*China. E-mail: jinrc427@126.com*

<sup>b</sup> *Department of Chemistry, Harbin Institute of Technology, Harbin 150001, P. R.*

*China.*

### **Experimental Section**

#### **Preparation of hierarchical Co<sub>9</sub>S<sub>8</sub> hollow spheres**

The Co<sub>9</sub>S<sub>8</sub> hollow spheres were fabricated by a solvothermal method. In this procedure, 0.123 g of cobalt acetate, 0.16 g of thiourea, and 0.6 g of hexamethylenetetramine were dissolved in 2 mL of distilled water. After stirring for 1 h, the mixed solution was transferred into a 25 mL Teflon-lined stainless autoclave. Subsequently, 18 mL of pyridine was added into the autoclave. The autoclave was sealed and maintained at 180 °C for 12 h. After the autoclave was cooled to room temperature, the black precipitate was centrifuged, washed with distilled water and ethanol for several times, and dried at 80 °C overnight for further characterization.

#### **Materials Characterization**

The crystal phase of the product was characterized by Rigaku D/Max-2550pc X-ray powder diffraction (XRD, Cu-K $\alpha$ ,  $\lambda$  = 1.5406 Å). The morphology was examined by field-emission scanning electron microscopy (FESEM, FEI Quanta 200F) and transmission electron microscopy (TEM, FEI Tecnai G2 S-Twin). Nitrogen

adsorption/desorption isotherm of the  $\text{Co}_9\text{S}_8$  hollow spheres was detected on Quantachrome NOVA-3000 system at 77 K.

#### Electrochemical measurement

Electrochemical tests were performed using a CR2025-type coin cell. For the electrode preparation, 70wt % of  $\text{Co}_9\text{S}_8$  hollow spheres, 15wt% of acetylene black, and 15wt% of polyvinylidene fluoride (PVDF) binder were mixed homogeneously in the N-methyl-2-pyrrolidinone (NMP). The obtained slurry was spread on Cu foil to form working electrodes and then dried in a vacuum at 100 °C for 12 h to remove the solvent. Lithium foil was used as the counter and reference electrode, Celgard 2400 as the separator and the 1 M  $\text{LiPF}_6$  in 1:1 wt/wt ethylene carbonate/diethyl carbonate as the electrolyte. Coin-type cells were assembled in an argon-filled glove box with concentrations of moisture and oxygen below 1.0 ppm. The charge/discharge tests were performed on a NEWARE battery test system at a constant current density of 50, 100, 200 and 500  $\text{mA g}^{-1}$  in the voltage range from 0.01 to 3.0 V. The Cyclic voltammograms test was conducted on electrochemical workstation (CHI660D, CH Instruments) in the potential range 0.01 to 3.0 V with a scan rate of 0.1  $\text{mV s}^{-1}$ .

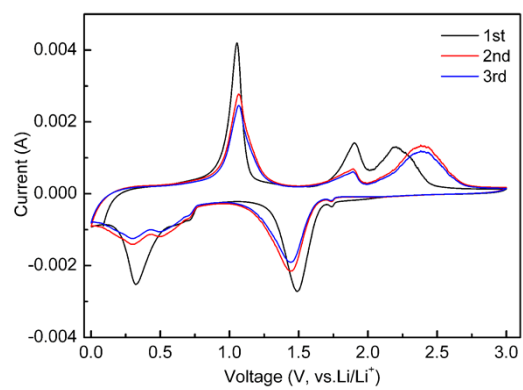

Fig. S1. Cyclic voltammograms of mesocrystal  $\text{Co}_9\text{S}_8$  hollow spheres electrode.
